# Supplementary material for: MOF-assisted synthesis of octahedral carbon-supported PtCu nanoalloy catalysts for an efficient hydrogen evolution reaction
Source: Royal Society of Chemistry journal article supplement (doi:10.1039/d0ta06632j), 2020-01-01
Supplement: d0ta06632j1.pdf [file d0ta06632j1.pdf]

## Supplementary Material

### **MOFs-assisted synthesis of octahedral carbon supported PtCu nanoalloy catalysts with efficient hydrogen evolution reaction**

Chengtian Zhang,<sup>a,b</sup> Pengyan Wang,<sup>a</sup> Wenqiang Li,<sup>a</sup> Zhiwei Zhang,<sup>a</sup> Jiawei Zhu,<sup>a</sup>  
Zonghua Pu,<sup>\*a</sup> Yufeng Zhao<sup>c</sup> and Shichun Mu<sup>\*a,b</sup>

<sup>a</sup>State Key Laboratory of Advanced Technology for Materials Synthesis and Processing, Wuhan University of Technology, Wuhan 430070, China.

<sup>b</sup>Foshan Xianhu Laboratory of the Advanced Energy Science and Technology Guangdong Laboratory, Xianhu hydrogen Valley, Foshan 528200, China.

<sup>c</sup>Institute for Sustainable Energy/College of Sciences, Shanghai University, Shanghai 200444, China.

\*Corresponding authors E-mail: [msc@whut.edu.cn](mailto:msc@whut.edu.cn) (S. Mu), [puzonghua@whut.edu.cn](mailto:puzonghua@whut.edu.cn) (Z. Pu)

### **Materials and reagent:**

All chemicals used in this experiment were analytical grade and used without further purification. Cupric acetate monohydrate ( $\text{Cu}(\text{CO}_2\text{CH}_3)_2 \cdot \text{H}_2\text{O}$ ), L-glutamic acid, Chloroplantinic acid and Ethanol were purchased from Sinopharm Chemical Reagents, China. 1,3,5-benzenetricarboxylic acid ( $\text{H}_3\text{BTC}$ ) was obtained from Aladdin Reagents Ltd. Phosphomolybdic acid were from Shanghai Macklin Biochemical Co., Ltd. The commercial Pt/C (20 wt. %) catalyst and Nafion (5 wt. %) were purchased from Sigma-Aldrich. The deionized water used throughout the whole experimental process was ultra-purified (18.25 M $\Omega$ ).

### **Preparation of NENU-5:**

NENU-5 ( $[\text{Cu}_2(\text{BTC})_{4/3}(\text{H}_2\text{O})_2]_6[\text{H}_3\text{PMo}_{12}\text{O}_{40}]$ , BTC=benzene-1,3,5-tricarboxylate) is based on a mature Cu-based MOF [HKUST-1:  $\text{Cu}_3(\text{BTC})_2(\text{H}_2\text{O})_3$ ] with Mo-based Keggin-type POMs ( $\text{H}_3\text{PMo}_{12}\text{O}_{40}$ ) periodically occupying the largest pores<sup>1</sup>. In a typical procedure, 0.6 g of copper (II) acetate monohydrate ( $\text{Cu}(\text{CO}_2\text{CH}_3)_2 \cdot \text{H}_2\text{O}$ ) 220 mg of L-glutamic acid and 0.9 g of phosphomolybdic acid hydrate were mixed in 120 ml of deionized water with stirring at ambient condition for 30 min. And then, 422 mg of  $\text{H}_3\text{BTC}$  were dissolved in 120 ml of ethanol, which was swiftly injected into the above solution in succession. Then, the resulting solution was stirred for 14 h at room temperature. The precipitate was obtained by centrifugation and washed twice with ethanol. Then the NENU-5 powders were dried in vacuum at 70 °C overnight.

### **Electrochemical Measurements.**

The polarization curves were plotted by the formula:  $E_{\text{actual}} = E_{\text{test}} - iR_s \times 100\%$ . The electrochemically active surface area (ECSA) was evaluated by measuring the charge

associated with Hupd adsorption ( $Q_H$ ) from CV curves in  $N_2$ -saturated 0.1 M  $HClO_4$  solution. The characteristic potential regions of Hupd range is from 0.05 to 0.4V (vs. RHE) and the scan rate was 50 mV/s. The ECSA was calculated based on the

$$ECSA = \frac{Q_H}{m \times q_H}$$

following equation:

Here,  $Q_H$  is the charge collected in the hydrogen adsorption region,  $m$  is the loading amount of Pt and  $q_H$  ( $0.21 \text{ mC cm}^{-2}$ ) is the charge required for monolayer adsorption of hydrogen on a Pt surface.

### **Material characterization and equipment**

The phase and crystalline structures of the products were characterized were performed on a Bruker D8 advance XRD system using Cu Ka radiation. X-ray photoelectron spectroscopy (XPS) testing was performed on an ESCALAB 250Xi/ESCALAB 250Xi X-ray photoelectron using a spectrometer Al Ka as the excitation source. The morphology and structure of the as-prepared nanoparticles were characterized by field emission scanning electron microscopy (FE-SEM, Zeiss Ultra Plus) with an acceleration voltage of 5 kV and transmission electron microscopy (TEM, JEM-2100F) with an acceleration voltage of 200 kV. The HAADF-STEM imaging test and the X-ray spectroscopy (EDS) analysis were performed on a Talos F200S. The Inductively Coupled Plasma-Optical Emission spectrometry (ICP-OES) test was performed on Prodigy 7.  $N_2$  adsorption-desorption isotherms were carried out on a Micromeritics ASAP 2020 system.

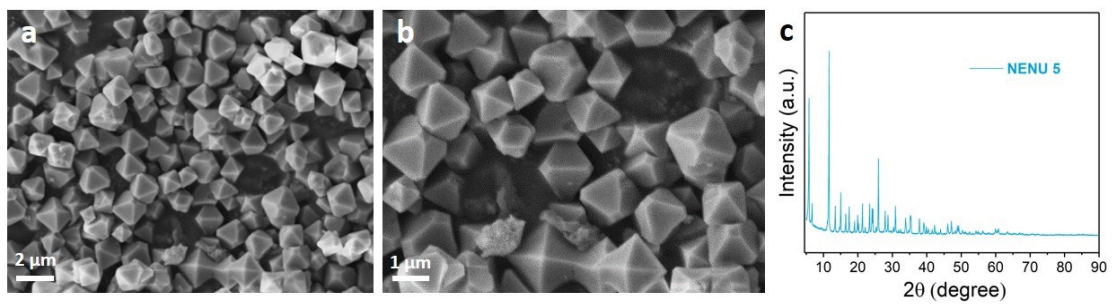

**Figure S1.** (a, b) SEM images of NENU-5. (c) XRD pattern of NENU-5.

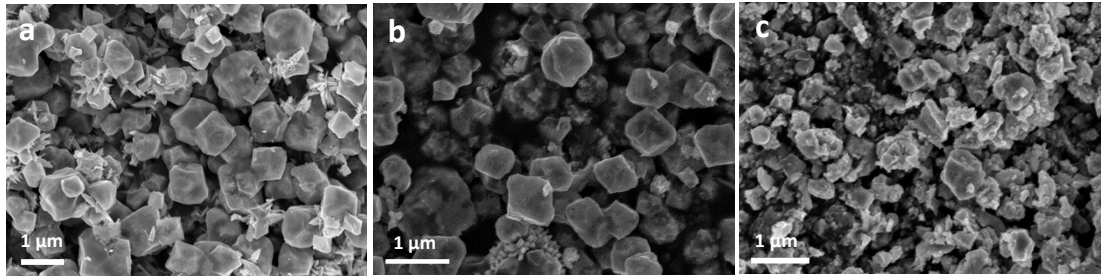

**Figure S2.** SEM images of (a) PtCu-MoO<sub>2</sub>@C-700 °C (b) PtCu-MoO<sub>2</sub>@C-800 °C and (c) PtCu-MoO<sub>2</sub>@C-900 °C.

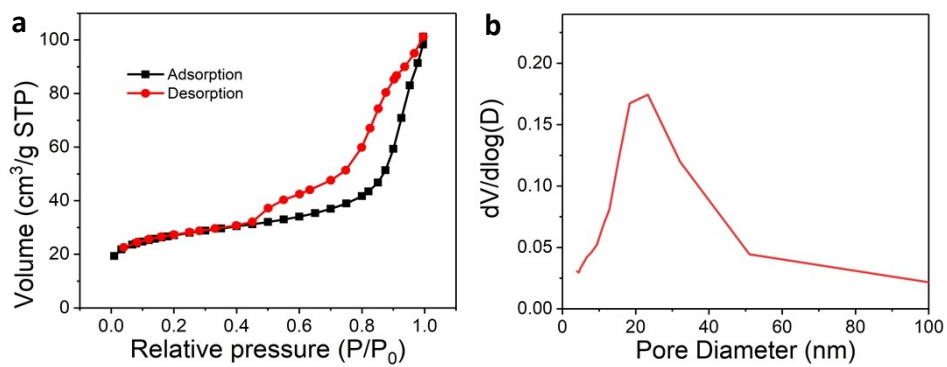

**Figure S3.** (a)  $N_2$  adsorption-desorption isotherms and (b) pore size distribution curve of PtCu-MoO<sub>2</sub>@C.

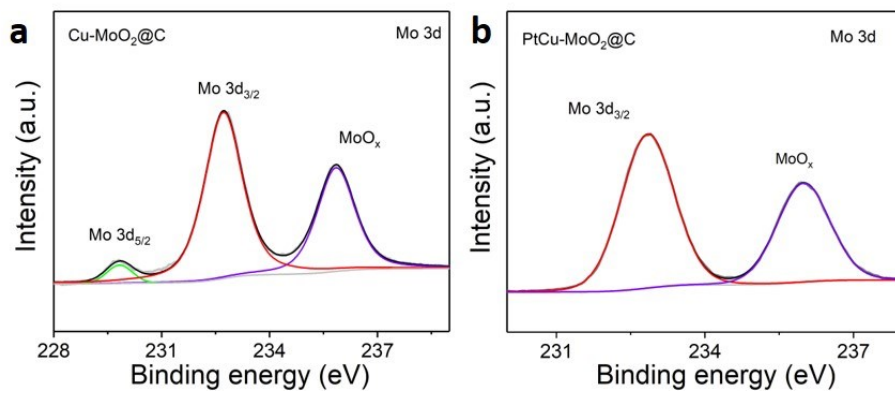

**Figure S4.** Mo 3d XPS spectrum of (a) Cu-MoO<sub>2</sub>@C and (b) PtCu-MoO<sub>2</sub>@C.

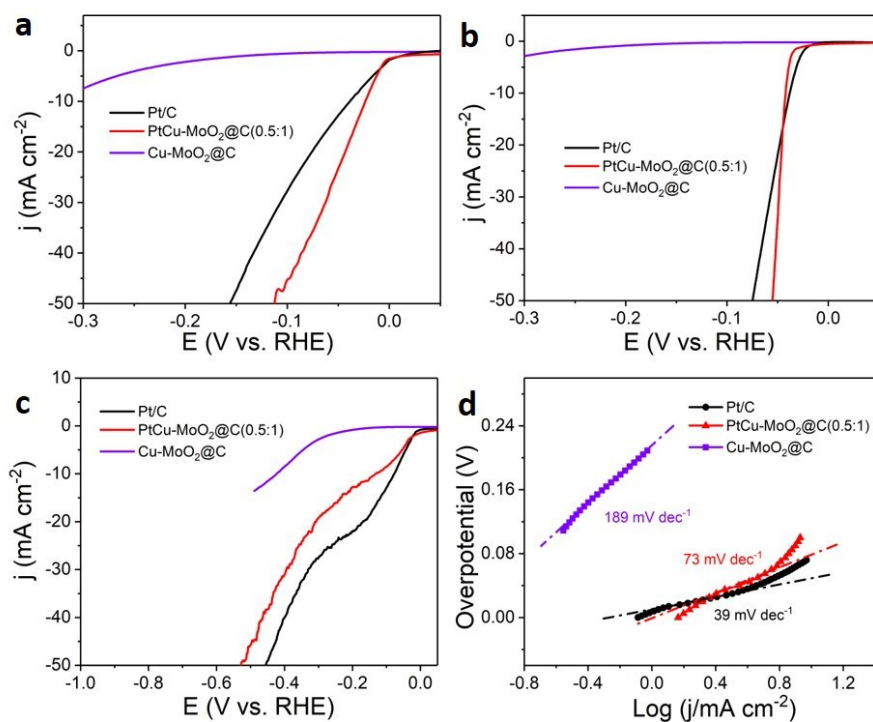

**Figure S5.** Polarization curves of PtCu-MoO<sub>2</sub>@C (0.5:1), Cu-MoO<sub>2</sub>@C and Pt/C in (a) 1 M KOH, (b) 0.5 M H<sub>2</sub>SO<sub>4</sub> and (c) 1 M PBS. (d) Corresponding Tafel slopes of PtCu-MoO<sub>2</sub>@C (0.5:1), Cu-MoO<sub>2</sub>@C and Pt/C in 1 M PBS.



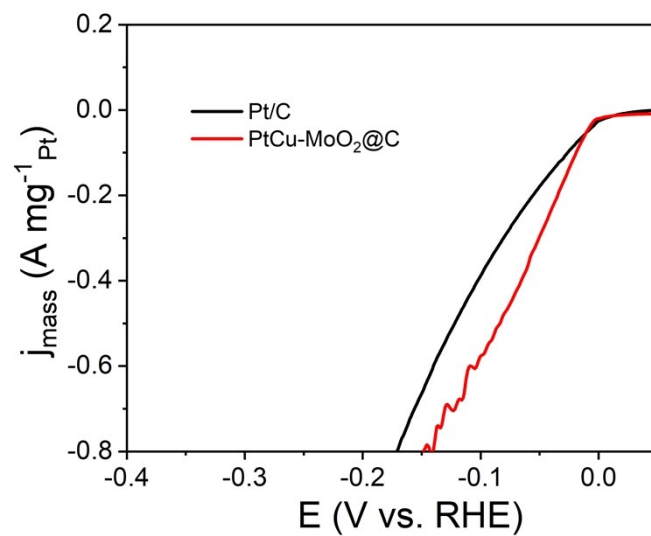

**Figure S6.** Mass activity curves of PtCu-MoO<sub>2</sub>@C and Pt/C in 1 M KOH (Normalized to Pt loading).

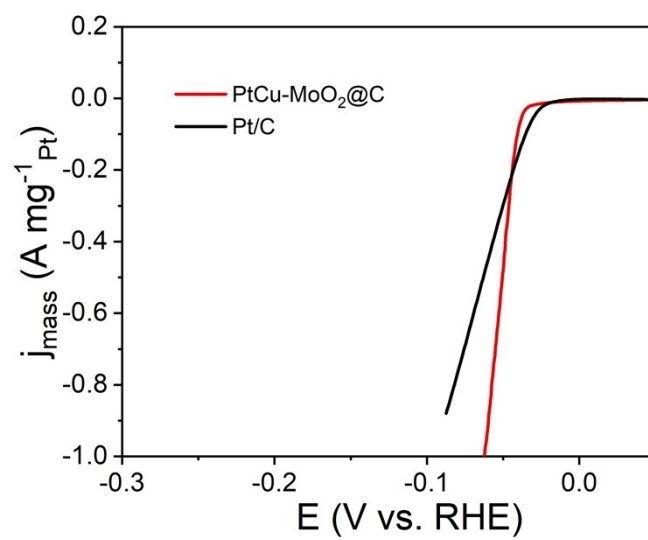

**Figure S7.** Mass activity curves of PtCu-MoO<sub>2</sub>@C and Pt/C in 0.5 M H<sub>2</sub>SO<sub>4</sub> (Normalized to Pt loading).

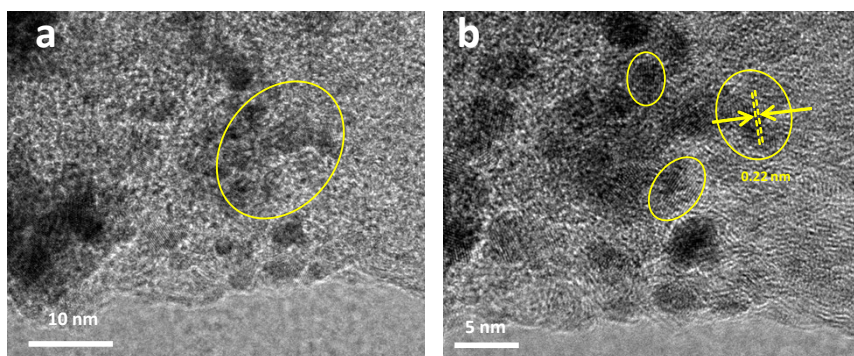

**Figure S8.** (a) and (b) HR-TEM images for PtCu-MoO<sub>2</sub>@C catalysts after 3,000 potential sweeps in 1 M KOH.

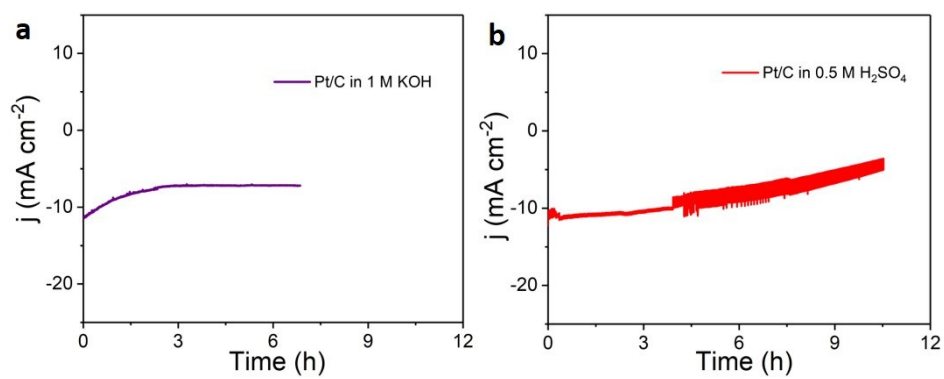

**Figure S9.** Long-term durability tests of Pt/C in (a) 1 M KOH and (b) 0.5 M H<sub>2</sub>SO<sub>4</sub>.

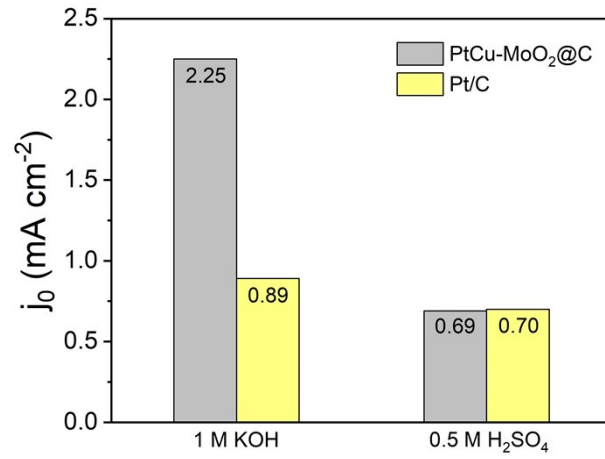

**Figure S10.** Exchange current density ( $j_0$ ) of PtCu-MoO<sub>2</sub>@C (0.5:1) and Pt/C in different media.

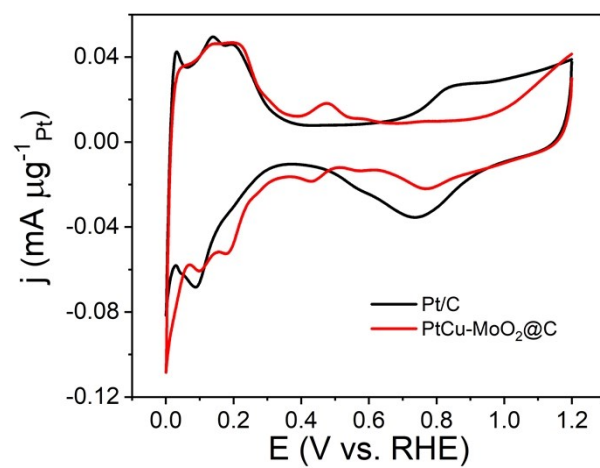

**Figure S11.** Cyclic voltammetry curves of PtCu-MoO<sub>2</sub>@C and Pt/C catalysts in N<sub>2</sub>-saturated 0.1 M HClO<sub>4</sub> solution with a sweep rate of 50 mV/s.

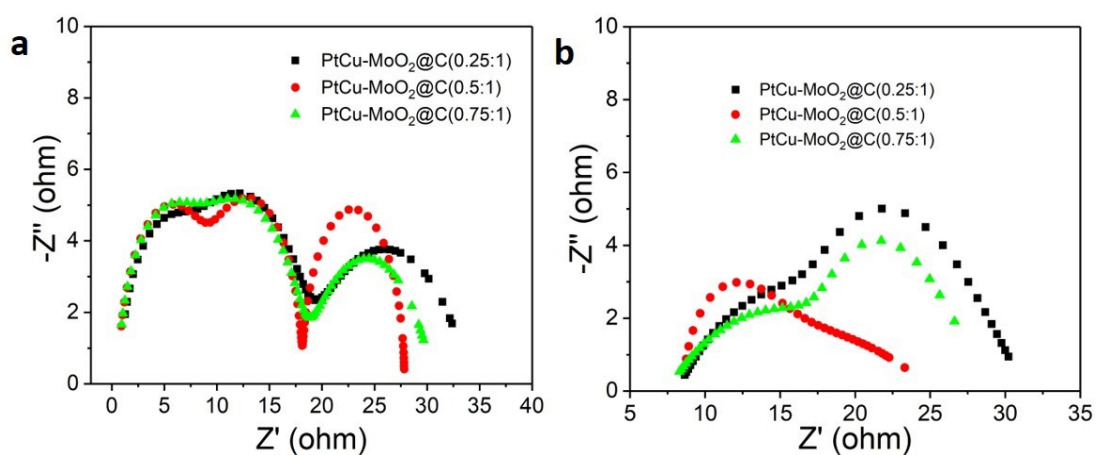

**Figure S12.** Comparison and fitting of Nyquist plots of different samples modified electrodes at same overpotential of (a) 50 mV in 1 M KOH. (b) 35 mV in 0.5 M H<sub>2</sub>SO<sub>4</sub>.

**Table S1** Comparison of HER performance in both basic and acidic media for the PtCu-MoO<sub>2</sub>@C and other electrocatalysts

| Catalyst                                                   | electrolyte                          | Pt loading (mg cm <sup>-2</sup> ) | Overpotential @j (mV@mA cm <sup>-2</sup> ) | Tafel slop (mV dec <sup>-1</sup> ) | Ref.      |
|------------------------------------------------------------|--------------------------------------|-----------------------------------|--------------------------------------------|------------------------------------|-----------|
| PtCu-MoO <sub>2</sub> @C                                   | 1 M KOH                              | 0.078                             | 24@10                                      | 37                                 | This work |
|                                                            | 0.5 M H <sub>2</sub> SO <sub>4</sub> | 0.078                             | 42@10                                      | 36                                 |           |
| Pd-Pt-S                                                    | 1 M KOH                              | 0.02                              | 71@10                                      | 31                                 | 2         |
| Pt-Ni octahedra                                            | 0.1 M KOH                            | 0.024                             | ~60@10                                     | 59                                 | 3         |
| Mo <sub>2</sub> C@NC@Pt                                    | 0.5 M H <sub>2</sub> SO <sub>4</sub> | —                                 | 27@10                                      | 28                                 | 4         |
|                                                            | 1 M KOH                              | —                                 | 47@10                                      | 57                                 |           |
| PtRh DNAs                                                  | 0.5 M H <sub>2</sub> SO <sub>4</sub> | —                                 | 27@10                                      | 40                                 | 5         |
|                                                            | 1 M KOH                              | —                                 | 28@10                                      | 47                                 |           |
| Pt <sub>13</sub> Cu <sub>73</sub> Ni <sub>14</sub> /CNF@CF | 1 M KOH                              | —                                 | 150@5                                      | 54                                 | 6         |
| Pt NWs/SL-Ni(OH) <sub>2</sub>                              | 1 M KOH                              | 0.016                             | 70@10                                      | 72                                 | 7         |
| Pt-CoS <sub>2</sub> /CC                                    | 1 M KOH                              | ~0.04                             | 24@10<br>112@100                           | 82                                 | 8         |
| Pt-Co(OH) <sub>2</sub> /CC                                 | 1 M KOH                              | ~0.39                             | 32@10                                      | 70                                 | 9         |
|                                                            |                                      |                                   | 54@20                                      |                                    |           |
|                                                            |                                      |                                   | 122@100                                    |                                    |           |
| Pt/Ni <sub>3</sub> N                                       | 1 M KOH                              | ~0.3                              | 40@10                                      | 36.5                               | 10        |
| Pt-NiFe                                                    | 1 M KOH                              | —                                 | 27@10                                      | 51                                 | 11        |
| Pt-Ni                                                      | 1 M KOH                              | 0.0075                            | 65@10                                      | 78                                 | 12        |
| Pt-Ni ASs                                                  | 1 M KOH                              | 0.017                             | 27.7@10                                    | 27                                 | 13        |
|                                                            |                                      |                                   | 53.8@30                                    |                                    |           |
| Pt-MoS <sub>2</sub>                                        | 0.5 M H <sub>2</sub> SO <sub>4</sub> | 0.036                             | 60@10                                      | 96                                 | 14        |
| Pt-MoO <sub>2</sub> @PC                                    | 0.5 M H <sub>2</sub> SO <sub>4</sub> | 0.012                             | 20@10                                      | 22                                 | 15        |
| Ru-MoO <sub>2</sub>                                        | 0.5 M H <sub>2</sub> SO <sub>4</sub> | 0.045                             | 55@10                                      | 44                                 | 16        |
|                                                            | 1 M KOH                              | 0.045                             | 29@10                                      | 31                                 |           |
| Pt-MoO <sub>2</sub> /CNTs                                  | 0.5 M H <sub>2</sub> SO <sub>4</sub> | 0.002                             | 60@10                                      | 43                                 | 17        |
| Pt/MoO <sub>2</sub>                                        | 0.5 M H <sub>2</sub> SO <sub>4</sub> | 0.018                             | 47@10                                      | 32.6                               | 18        |
| Pd@PdPt                                                    | 0.5 M H <sub>2</sub> SO <sub>4</sub> | 0.06                              | 39@10                                      | 38                                 | 19        |
| PtCoNi FNs                                                 | 0.5 M H <sub>2</sub> SO <sub>4</sub> | 0.085                             | 41@10                                      | 37                                 | 20        |
| Pt <sub>2</sub> Co <sub>8</sub> @N-C                       | 0.5 M H <sub>2</sub> SO <sub>4</sub> | 0.2                               | 47@20                                      | 48                                 | 21        |



## Notes and references

1. C. Sun, S. Liu, D. Liang, K. Shao, Y. Ren and Z. Su, *J. Am. Chem. Soc.*, 2009, **131**, 1883-1888.
2. J. Fan, K. Qi, L. Zhang, H. Zhang, S. Yu and X. Cui, *ACS Appl. Mater. Inter.*, 2017, **9**, 18008-18014.
3. R. Kavian, S. I. Choi, J. Park, T. Liu, H. Peng, N. Lu, J. Wang, M. Kim, Y. Xia and S. Lee, *J. Mater. Chem. A*, 2016, **4**, 12392-12397.
4. J. Chi, J. Xie, W. Zhang, B. Dong, J. Qin, X. Zhang, J. Lin, Y. Chai and C. Liu, *ACS Appl. Mater. Inter.*, 2019, **11**, 4047-4056.
5. Z. Han, R. Zhang, J. Duan, A. Wang, Q. Zhang, H. Huang and J. Feng, *Int. J. Hydrogen Energ.*, 2020, **45**, 6110-6119.
6. Y. Shen, A. C. Lua, J. Xi and X. Qiu, *ACS Appl. Mater. Inter.*, 2016, **8**, 3464-3472.
7. H. Yin, S. Zhao, K. Zhao, K. Abdul, H. Tang, L. Chang, H. Zhao, Y. Gao and Z. Tang, *Nat. Commun.*, 2015, **6**, 6430.
8. X. Han, X. Wu, D. Yida, J. Liu, J. Lu, C. Zhong and W. Hu, *Adv. Energy Mater.*, 2018, **8**, 1800935.
9. Z. Xing, C. Han, D. Wang, Q. Li and X. Yang, *ACS Catal*, 2017, **7**, 7131-7135.
10. Y. Wang, L. Chen, X. Yu, Y. Wang and G. Zheng, *Adv. Energy Mater.*, 2016, **7**, 1601390.
11. S. Anantharaj, K. Karthick, M. Venkatesh, T. V. S. V. Simha, A. S. Salunke, L. Ma, H. Liang and S. Kundu, *Nano Energy*, 2017, **39**, 30-43.
12. Z. Cao, Q. Chen, J. Zhang, H. Li, Y. Jiang, S. Shen, G. Fu, B. Lu, Z. Xie and L. Zheng, *Nat. Commun.*, 2017, **8**, 15131.
13. Z. Zhang, G. Liu, X. Cui, B. Chen, Y. Zhu, Y. Gong, F. Saleem, S. Xi, Y. Du, A. Borgna, Z. Lai, Q. Zhang, B. Li, Y. Zong, Y. Han, L. Gu and H. Zhang, *Adv. Mater.*, 2018, **30**, 1801741.
14. J. Deng, H. Li, J. Xiao, Y. Tu, D. Deng, H. Yang, H. Tian, J. Li, P. Ren and X. Bao, *Energy Environ. Sci.*, 2015, **8**, 1594-1601.
15. Y. Jiang, M. Yang, M. Qu, Y. Wang, Z. Yang, Q. Feng, X. Deng, W. Shen, M. Li and R. He, *J Mater Chem A*, 2020, **8**, 10409-10418.
16. P. Jiang, Y. Yang, R. Shi, G. Xia, J. Chen, J. Su and Q. Chen, *J. Mater. Chem. A*, 2017, **5**, 5475-5485.
17. X. Xie, Y. Jiang, C. Yuan, N. Jiang, S. Zhao, L. Jia and A. Xu, *J. Phys. Chem. C*, 2017, **121**, 24979-24986.
18. X. Li, J. Yu, J. Jia, A. Wang, L. Zhao, T. Xiong, H. Liu and W. Zhou, *Nano Energy*, 2019, **62**, 127-135.
19. Y. Liu, S. Liu, Z. Che, S. Zhao, X. Sheng, M. Han and J. Bao, *J. Mater. Chem. A*, 2016, **4**, 16690-16697.
20. M. Liu, L. Chen, A. Wang, K. Fang and J. Feng, *Int. J. Hydrogen Energ.*, 2017, **42**, 25277-25284.
21. W. Ren, W. Zang, H. Zhang, J. Bian, Z. Chen, C. Guan and C. Cheng, *Carbon*, 2019, **142**, 206-216.
